# Supplementary material for: Fe–N-Doped carbon foam nanosheets with embedded Fe2O3 nanoparticles for highly efficient oxygen reduction in both alkaline and acidic media
Source: Royal Society of Chemistry journal article supplement (doi:10.1039/c6ra27826d), 2017-01-01
Supplement: c6ra27826d1.pdf [file c6ra27826d1.pdf]

## Supporting Information

### **Fe–N-doped carbon foam nanosheets with embedded Fe<sub>2</sub>O<sub>3</sub> nanoparticles for highly efficient oxygen reduction in both alkaline and acidic media**

Xueyan Xu, Chengxiang Shi, Qi Li, Rui Chen and Tiehong Chen\*

School of Materials Science and Engineering, Institute of New Catalytic Materials Science, Key Laboratory of Advanced Energy Materials Chemistry (MOE), Collaborative Innovation Center of Chemical Science and Engineering (Tianjin), Nankai University, Tianjin 300350

\* E-mail: [chenth@nankai.edu.cn](mailto:chenth@nankai.edu.cn)

## Electrochemical measurements

The kinetic parameters can be analyzed with the Koutecky–Levich equation:

$$J^{-1} = J_K^{-1} + J_L^{-1} = (nFkC)^{-1} + (0.62nFCD^{2/3}v^{-1/6}\omega^{1/2})^{-1}$$

wherein  $J$ ,  $J_K$  and  $J_L$  represent the measured current density, the kinetic current density, and diffusion limiting current density, respectively,  $\omega$  is rotation rate of the electrode,  $n$  is the electron transfer number,  $F$  is the Faraday constant,  $C$  is the bulk concentration of  $O_2$  dissolved in the electrolyte ( $1.2 \times 10^{-3} \text{ mol L}^{-1}$ ),  $D$  is the diffusion coefficient of  $O_2$  in the electrolyte ( $1.9 \times 10^{-5} \text{ cm}^2 \text{ s}^{-1}$ ),  $v$  is the kinematic viscosity of the electrolyte ( $1.0 \times 10^{-2} \text{ cm}^2 \text{ s}^{-1}$ ), and  $k$  is the electron transfer rate constant.<sup>1</sup> The values of  $C$ ,  $D$  and  $v$  are the same in both 0.1 M KOH and 0.5 M  $H_2SO_4$  solution.<sup>2</sup>

## References:

1. R. E. Davis, G. L. Horvath, C. W. Tobias, *Electrochim. Acta*, 1967, **12**, 287-297.
2. J. H. Xue, L. Zhao, Z. Y. Dou, Y. Yang, Y. Yue, Z. Zhu, *Rsc Adv*, 2016, **6**, 110820-110830

**Table S1.** BET surface areas and total pore volumes of Fe<sub>2</sub>O<sub>3</sub>@Fe-N-C-800-BM and Fe<sub>2</sub>O<sub>3</sub>@Fe-N-C obtained at different carbonization temperatures

| Sample                                     | T(°C) <sup>a</sup> | S <sub>BET</sub> (m <sup>2</sup> g <sup>-1</sup> ) <sup>b</sup> | V <sub>total</sub> (cm <sup>3</sup> g <sup>-1</sup> ) <sup>c</sup> |
|--------------------------------------------|--------------------|-----------------------------------------------------------------|--------------------------------------------------------------------|
| Fe <sub>2</sub> O <sub>3</sub> @Fe-N-C-700 | 700                | 497                                                             | 0.58                                                               |
| Fe <sub>2</sub> O <sub>3</sub> @Fe-N-C-800 | 800                | 646                                                             | 0.85                                                               |
| Fe <sub>2</sub> O <sub>3</sub> @Fe-N-C-900 | 900                | 527                                                             | 0.73                                                               |

<sup>a</sup> Carbonization temperature.

<sup>b</sup> BET specific surface areas obtained from N<sub>2</sub> adsorption isotherm in the range of P/P<sub>0</sub> = 0.05-0.3.

<sup>c</sup> Total pore volume was obtained at P/P<sub>0</sub> of 0.98.

**Table S2.** XPS data for the surface species of Fe<sub>2</sub>O<sub>3</sub>@Fe-N-C-800-BM and Fe<sub>2</sub>O<sub>3</sub>@Fe-N-C-T materials obtained at different temperatures and their content nitrogen species

| Sample                                        | N<br>(at%) | Fe<br>(at%) | pyridinic-N<br>(%) | graphitic-N<br>(%) | oxidized-N<br>(%) |
|-----------------------------------------------|------------|-------------|--------------------|--------------------|-------------------|
| Fe <sub>2</sub> O <sub>3</sub> @Fe-N-C-700    | 17.8       | 1.9         | 53                 | 41                 | 6                 |
| Fe <sub>2</sub> O <sub>3</sub> @Fe-N-C-800    | 9.9        | 2.3         | 46                 | 47                 | 7                 |
| Fe <sub>2</sub> O <sub>3</sub> @Fe-N-C-900    | 4.8        | 0.7         | 41                 | 49                 | 10                |
| Fe <sub>2</sub> O <sub>3</sub> @Fe-N-C-800-BM | 10.6       | 0.2         | 43                 | 50                 | 7                 |

**Table S3.** The data of catalytic activity for Fe<sub>2</sub>O<sub>3</sub>@Fe-N-C-T in 0.1 M KOH solution

| Samples                                       | Onset-potential<br>V (vs. Ag/AgCl) | Half-wave<br>potential | $J^a$<br>(mA cm <sup>-2</sup> ) | $J_K^b$<br>(mA cm <sup>-2</sup> ) |
|-----------------------------------------------|------------------------------------|------------------------|---------------------------------|-----------------------------------|
| Fe <sub>2</sub> O <sub>3</sub> @Fe-N-C-700    | 0.001                              | -0.278                 | 0.880                           | 9.09                              |
| Fe <sub>2</sub> O <sub>3</sub> @Fe-N-C-800    | 0.054                              | -0.104                 | 3.617                           | 11.73                             |
| Fe <sub>2</sub> O <sub>3</sub> @Fe-N-C-900    | 0.052                              | -0.115                 | 3.406                           | 10.85                             |
| Fe <sub>2</sub> O <sub>3</sub> @Fe-N-C-800-BM | 0.021                              | -0.270                 | 1.765                           | 5.11                              |
| Pt/C                                          | 0.056                              | -0.136                 | 2.565                           | 9.57                              |

<sup>a</sup> The experimental current density ( $J$ ) at -0.15 V determined at the polarization curve at 1600rpm in 0.1M KOH solution

<sup>b</sup> The kinetic current densities ( $J_K$ ) at -0.10 V determined at the polarization curve at 1600rpm in 0.1M KOH solution

**Table S4.** The data of catalytic activity for Fe<sub>2</sub>O<sub>3</sub>@Fe-N-C-Tin 0.5 M H<sub>2</sub>SO<sub>4</sub> solution

| Samples                                       | Onset-potential<br>V (vs. Ag/AgCl) | Half-wave<br>potential | $J^a$<br>(mA cm <sup>-2</sup> ) | $J_K^b$<br>(mA cm <sup>-2</sup> ) |
|-----------------------------------------------|------------------------------------|------------------------|---------------------------------|-----------------------------------|
| Fe <sub>2</sub> O <sub>3</sub> @Fe-N-C-700    | 0.637                              | 0.380                  | 2.805                           | 7.04                              |
| Fe <sub>2</sub> O <sub>3</sub> @Fe-N-C-800    | 0.698                              | 0.535                  | 4.656                           | 10.47                             |
| Fe <sub>2</sub> O <sub>3</sub> @Fe-N-C-900    | 0.640                              | 0.499                  | 4.405                           | 9.16                              |
| Fe <sub>2</sub> O <sub>3</sub> @Fe-N-C-800-BM | 0.680                              | 0.494                  | 3.523                           | 6.19                              |
| Pt/C                                          | 0.702                              | 0.569                  | 4.439                           | 12.25                             |

<sup>a</sup> The experimental current density ( $J$ ) at 0.35V determined at the polarization curve at 1600rpm in 0.5M H<sub>2</sub>SO<sub>4</sub> solution

<sup>b</sup> The kinetic current densities ( $J_K$ ) at 0.60V determined at the polarization curve at 1600rpm in 0.5M H<sub>2</sub>SO<sub>4</sub> solution

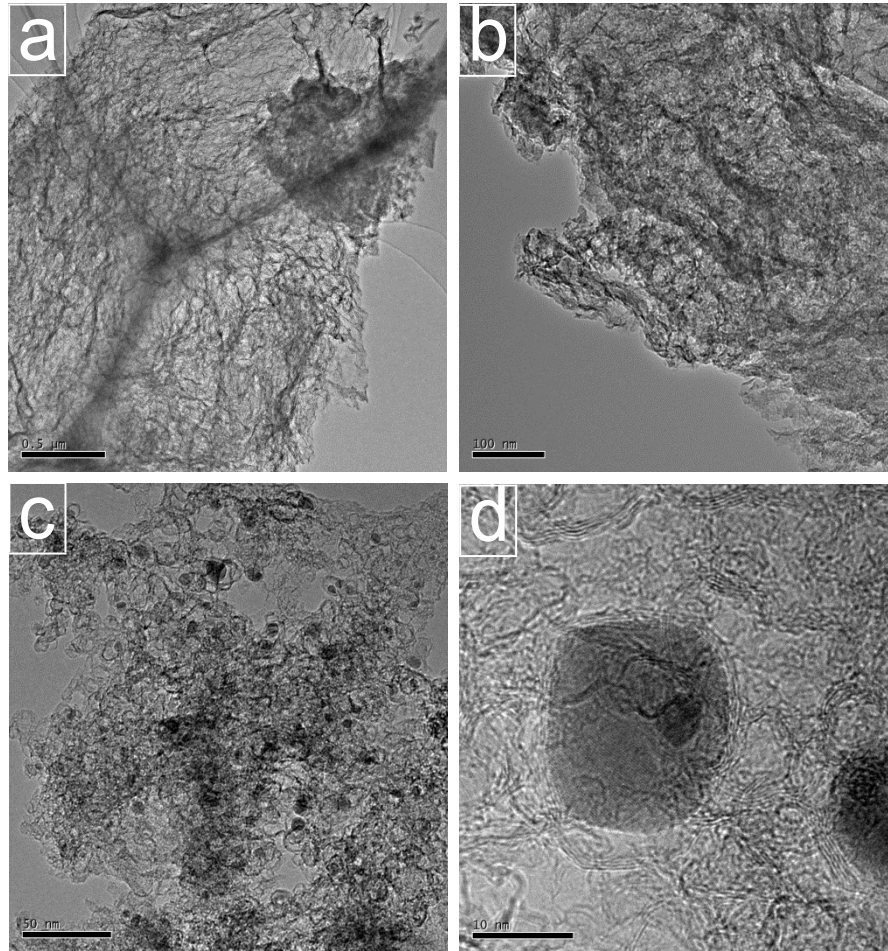

**Fig. S1** (a, b) TEM images of  $\text{Fe}_2\text{O}_3@\text{Fe-N-C-700}$ ; (c, d) TEM images of  $\text{Fe}_2\text{O}_3@\text{Fe-N-C-900}$ .

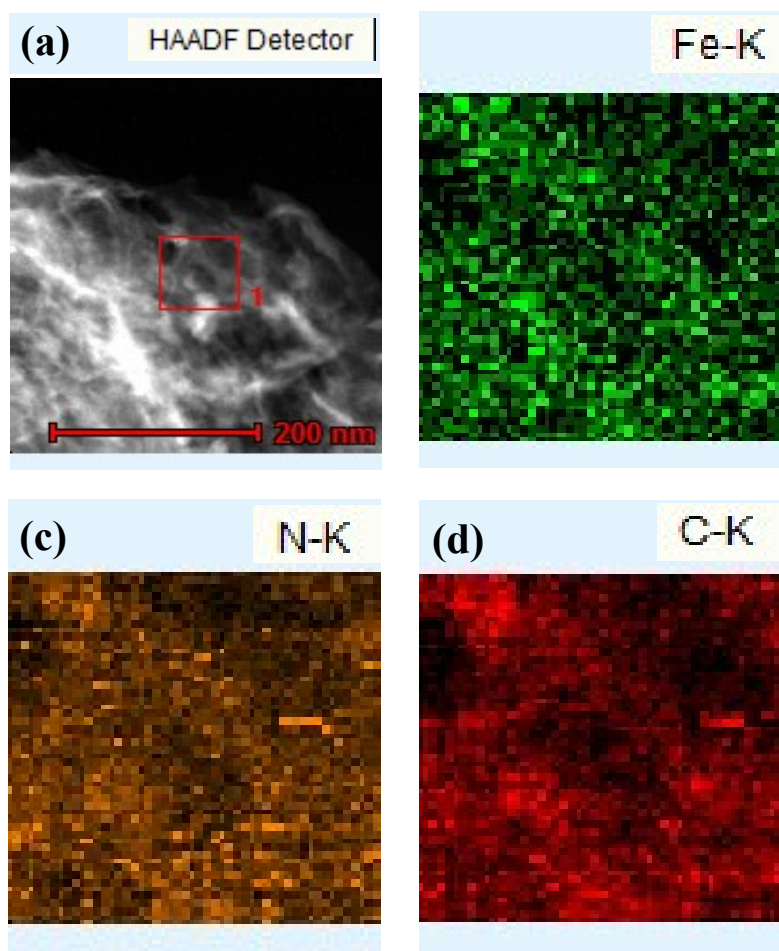

**Fig. S2** (a) STEM image of  $\text{Fe}_2\text{O}_3@\text{Fe-N-C-800}$ , and elemental mapping images (recorded in region 1) of (b) Fe, (c) N, and (d) C.



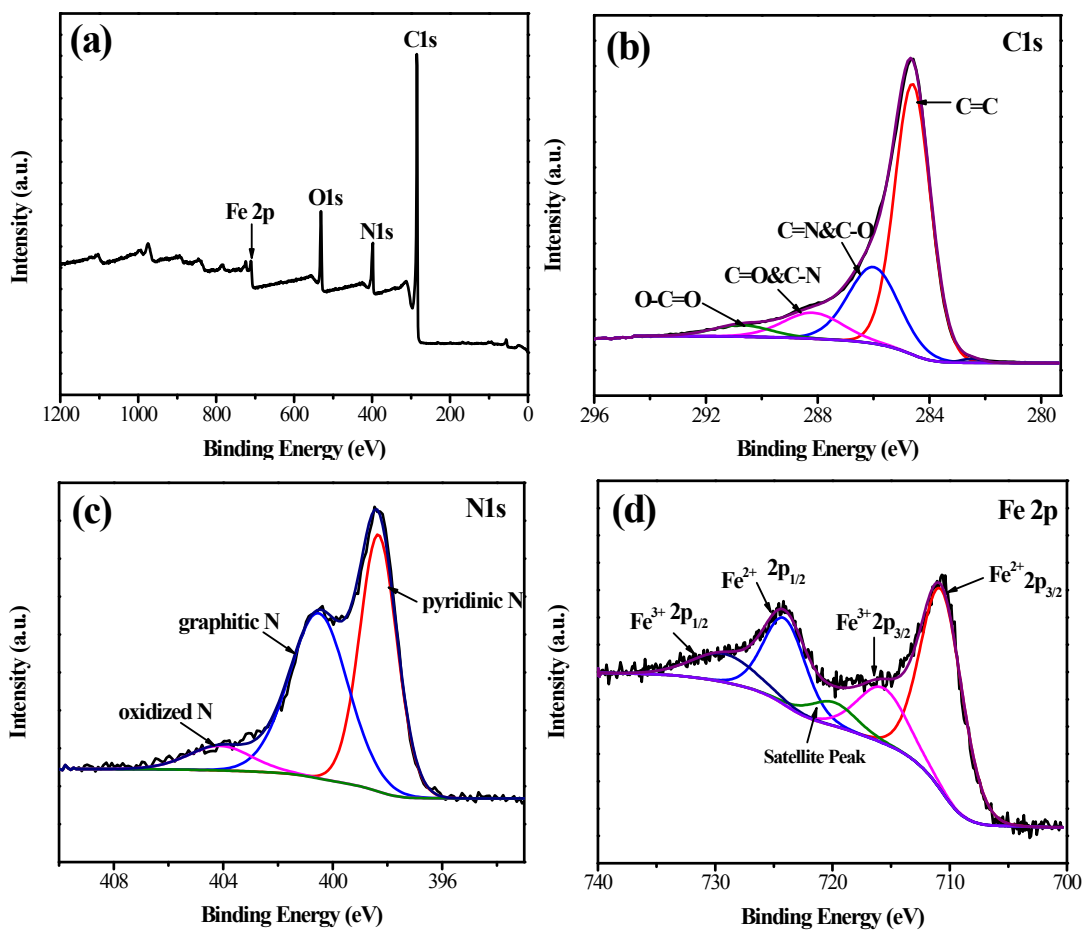

**Fig. S3** (a) Wide XPS survey of the  $\text{Fe}_2\text{O}_3@\text{Fe-N-C-800}$ . High-resolution (b) C 1s, (c) N 1s, and (d) Fe 2p spectra of the  $\text{Fe}_2\text{O}_3@\text{Fe-N-C-800}$ .

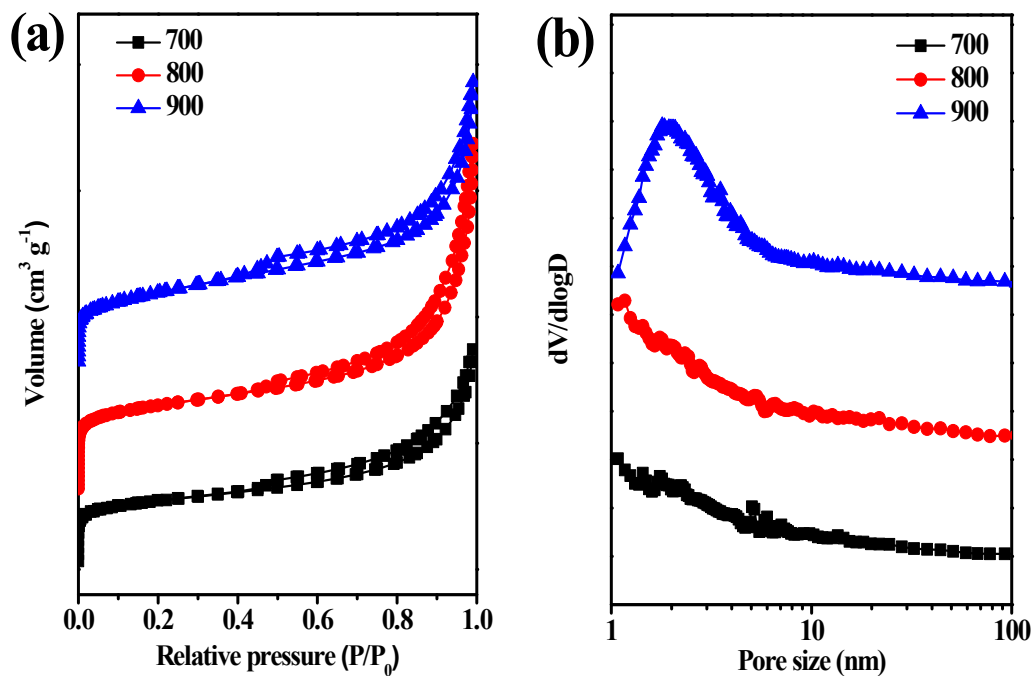

**Fig. S4** (a) Nitrogen adsorption-desorption isotherms of Fe<sub>2</sub>O<sub>3</sub>@Fe-N-C-T samples prepared at different carbonization temperature of 700, 800 and 900°C, respectively; (b) the corresponding pore size distribution curves.

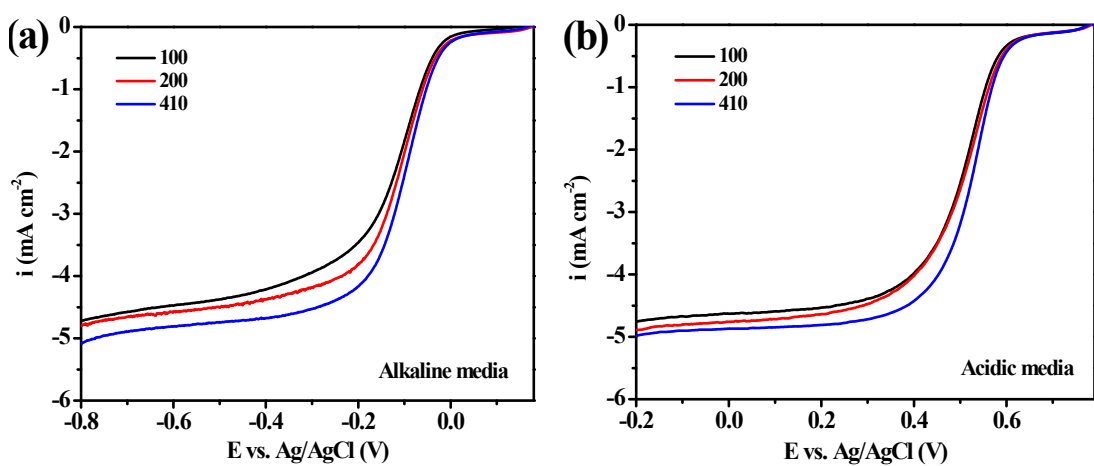

**Fig. S5** LSVs of Fe<sub>2</sub>O<sub>3</sub>@Fe-N-C-800 with different catalyst loadings(100, 200 and 410 µg cm<sup>-2</sup>) at a scan rate of 5 mV s<sup>-1</sup> and a rotation rate of 1600 rpm in O<sub>2</sub>-saturated (a) 0.1 M KOH and (b) 0.5 M H<sub>2</sub>SO<sub>4</sub>, respectively.

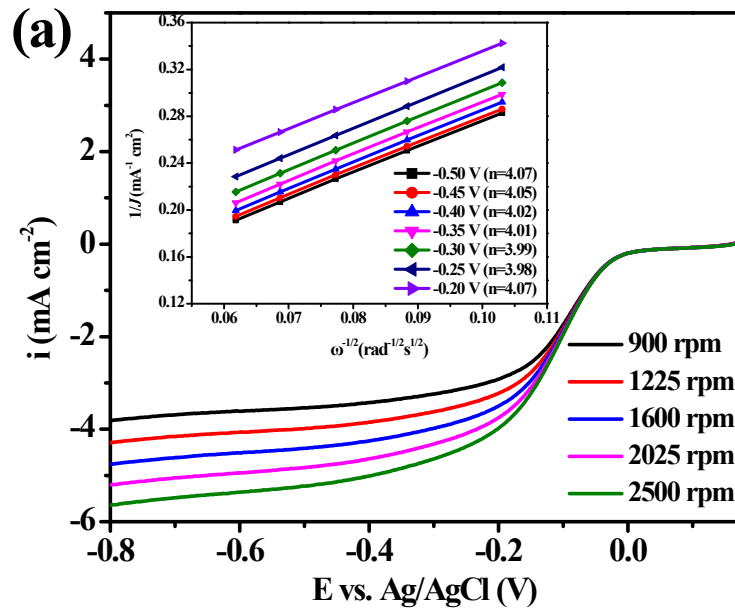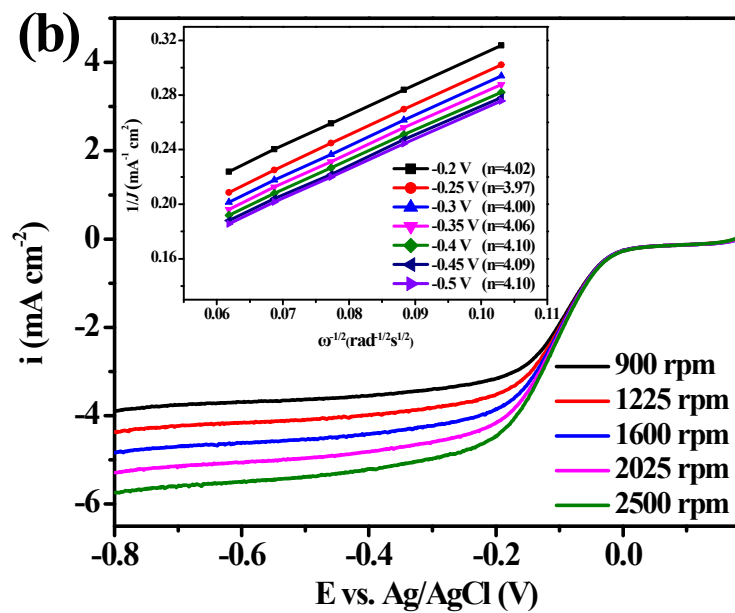

**Fig. S6** LSV curves at rotation rate from 900 to 2500 rpm and the corresponding K-L plots (inset) of  $\text{Fe}_2\text{O}_3@\text{Fe-N-C-800}$  with the catalyst loading of (a)  $100 \mu\text{g cm}^{-2}$  and (b)  $200 \mu\text{g cm}^{-2}$  in  $0.1\text{M}$  KOH solution.

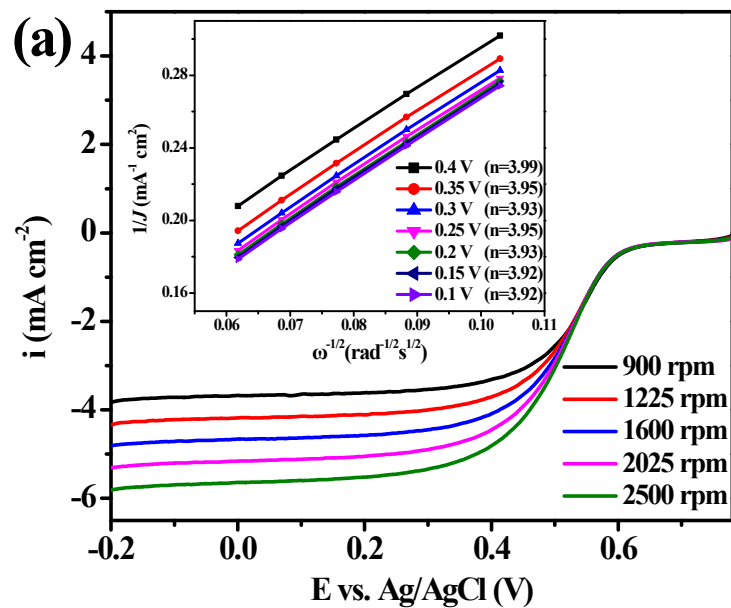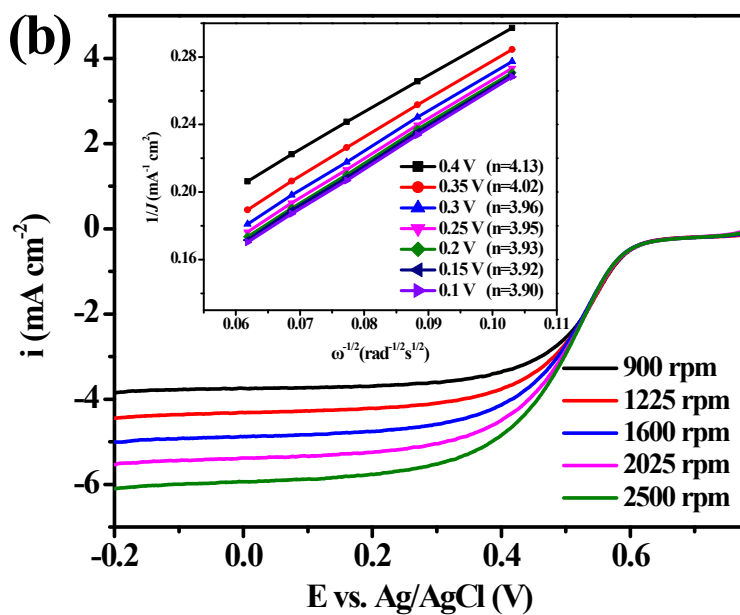

**Fig. S7** LSV curves at rotation rate from 900 to 2500 rpm and the corresponding K-L plots (inset) of  $\text{Fe}_2\text{O}_3@Fe-N-C-800$  with the catalyst loading of (a)  $100 \mu\text{g cm}^{-2}$  and (b)  $200 \mu\text{g cm}^{-2}$  in  $0.5\text{M H}_2\text{SO}_4$  solution.

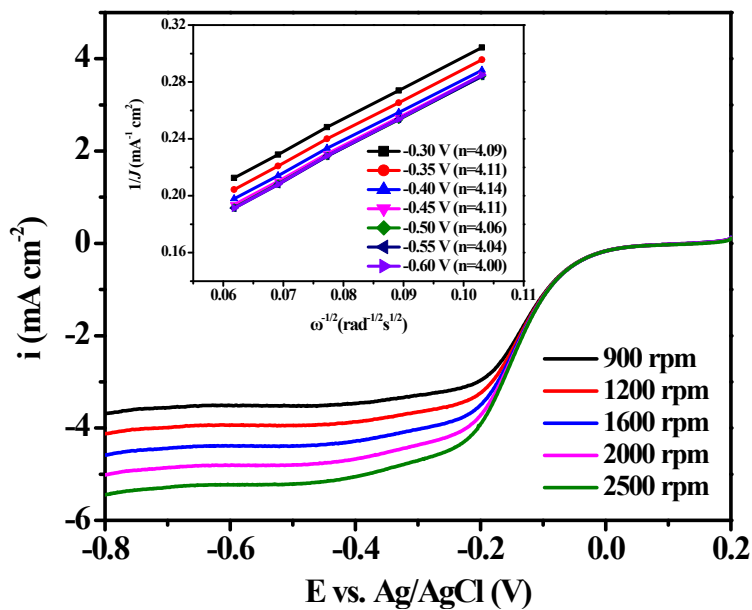

**Fig. S8** LSV curves at rotation rate from 900 to 2500 rpm and the corresponding K-L plots (inset) of Pt/C with the catalyst loading of  $41\mu\text{g Pt cm}^{-2}$  in 0.1M KOH solution.

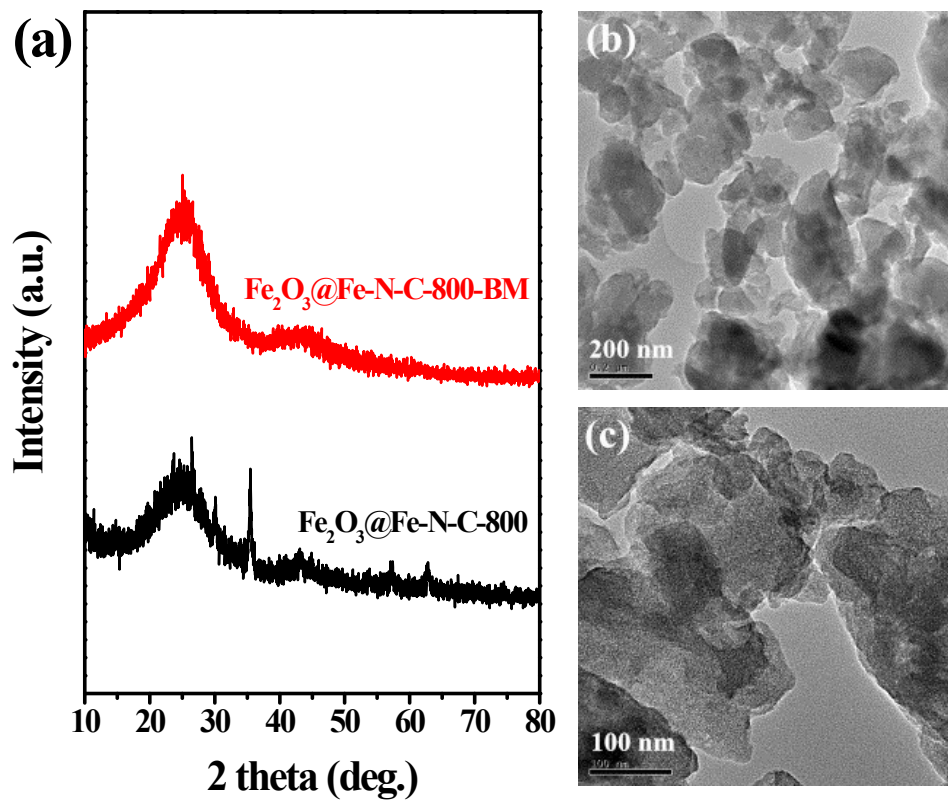

**Fig. S9** (a) XRD patterns of  $\text{Fe}_2\text{O}_3@\text{Fe-N-C-800}$  and  $\text{Fe}_2\text{O}_3@\text{Fe-N-C-800-BM}$ ; (b, c) TEM images of  $\text{Fe}_2\text{O}_3@\text{Fe-N-C-800-BM}$ .

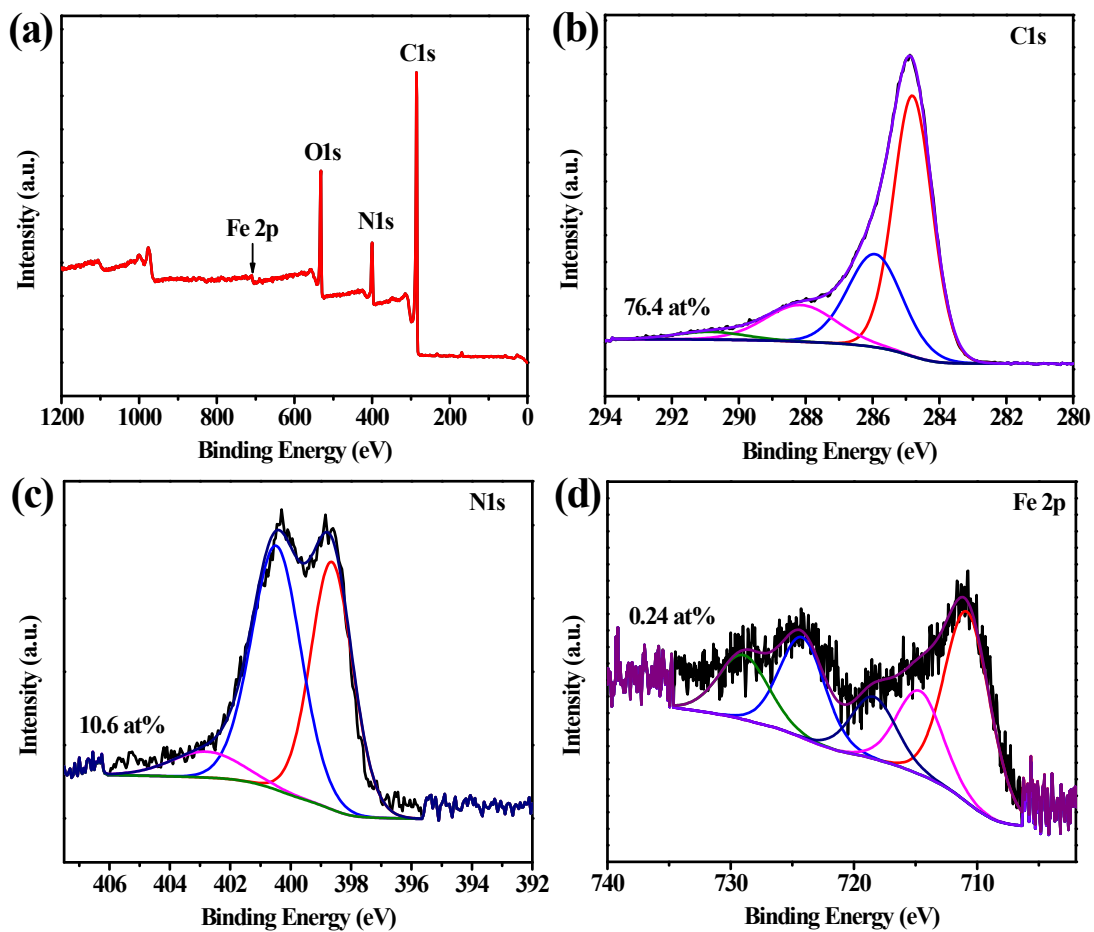

**Fig. S10** (a) Wide XPS survey of the  $\text{Fe}_2\text{O}_3@$ Fe-N-C-800-BM. High-resolution (b) C1s, (c) N1s, and (d) Fe 2p spectra of the  $\text{Fe}_2\text{O}_3@$ Fe-N-C-800-BM.



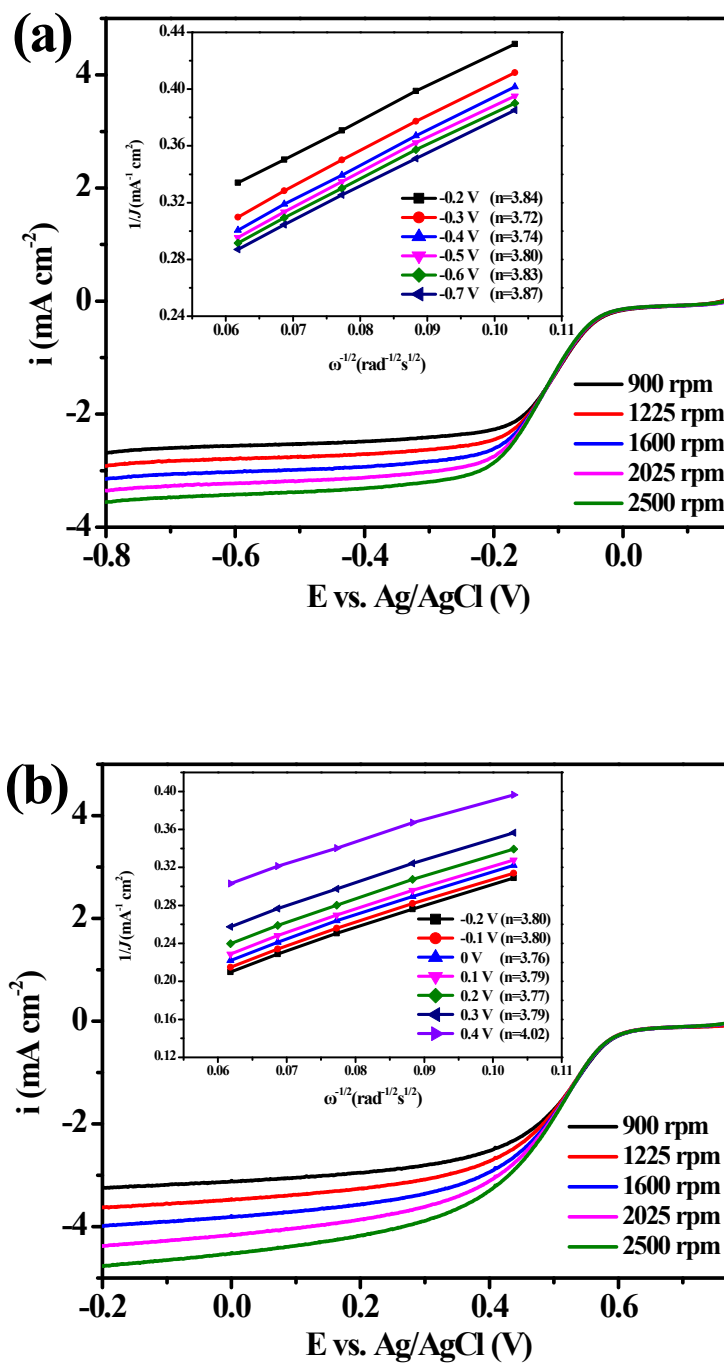

**Fig. S11** LSV curves at rotation rate from 900 to 2500 rpm and the corresponding K-L plots (inset) of the Fe<sub>2</sub>O<sub>3</sub>@Fe-N-C-800-BMin (a) 0.1M KOH and (b) 0.5M H<sub>2</sub>SO<sub>4</sub> solution.
